# Supplementary material for: Label-free Assessment of the Nascent State of Rat Non-alcoholic Fatty Liver Disease Using Spontaneous Raman Microscopy
Source: PubMed Central journal article supplement — Acta Histochem Cytochem. 2022 Apr 22;55(2):57–66. doi: 10.1267/ahc.22-00013 (PMC9043435; doi:10.1267/ahc.22-00013), 2022-04-22
Supplement: 22-00013_1.pdf [file 22-00013_1.pdf]

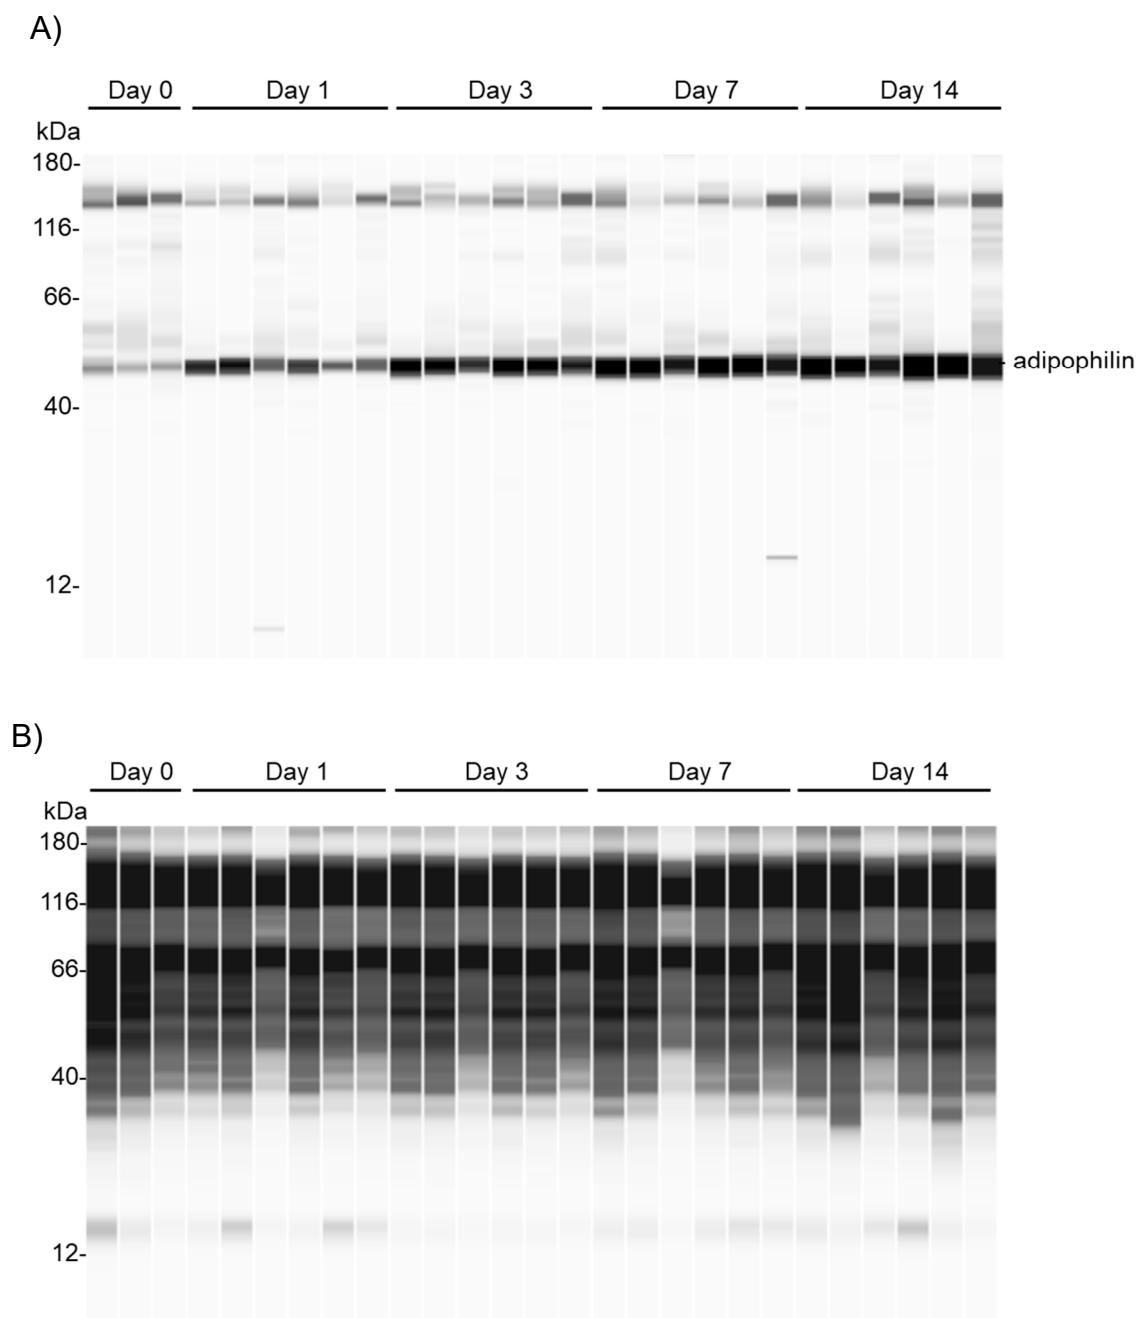

**Fig. S1.** (A) Total results of Wes immunoassay using adipophilin antibody of rat livers after feeding a high-fat, high-cholesterol diet (HFHCD). (B) Total protein detection in the liver samples used in the Wes immunoassay.

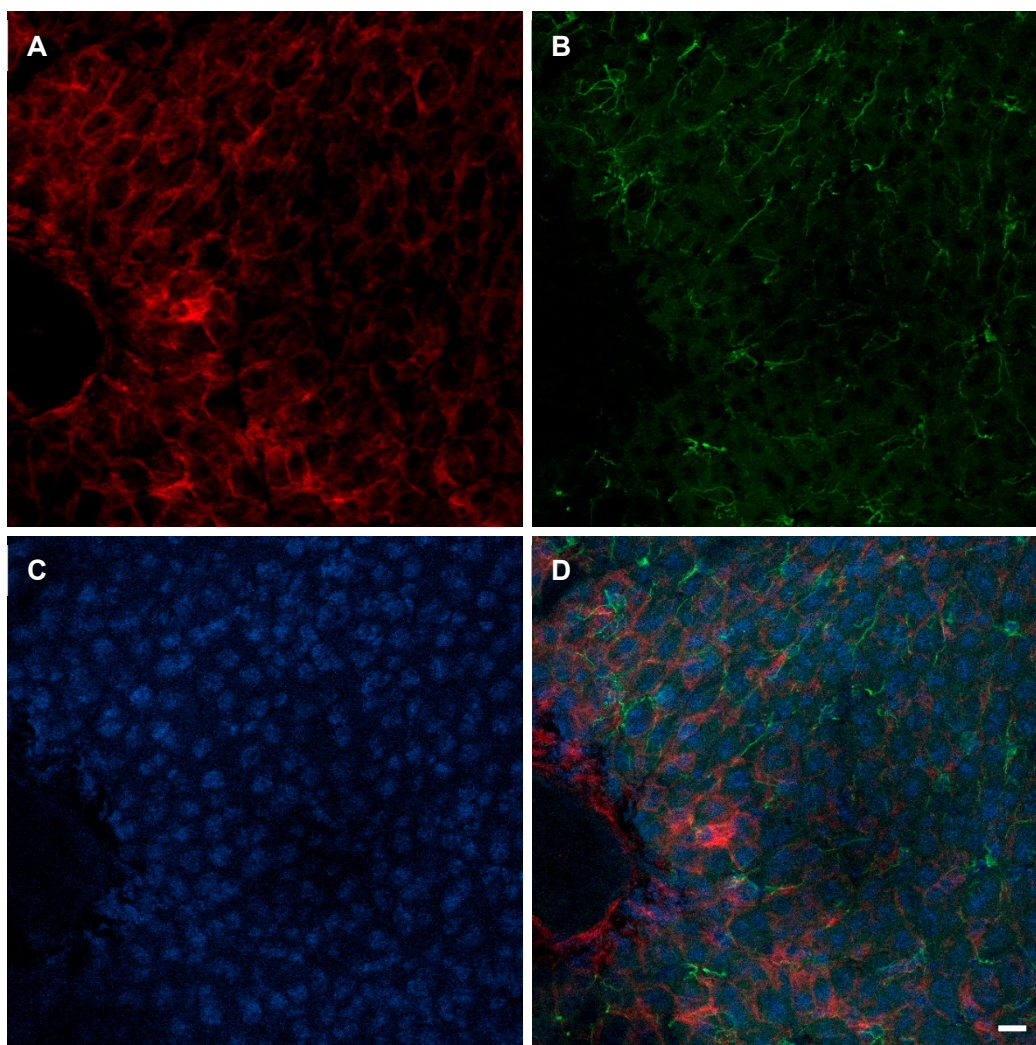

**Fig. S2.** Representative confocal microscope images of a rat normal liver tissue subjected to immunofluorescence reaction with anti-glial fibrillary acidic protein (GFAP) antibody. **A)** Alexa Fluor 633 phalloidin (red) to visualize F-actin, **B)** GFAP (green) to label hepatic stellate cells, **C)** Hoechst 33342 (blue) to visualize nuclei, and **D)** merged image. Bar = 20  $\mu\text{m}$ .

## **Methods**

### Immunohistochemical analysis

A portion of the livers of 8-week-old Slc: Sprague-Dawley male rats (Shimizu Laboratory Supplies, Kyoto, Japan) were excised and snap-frozen. The frozen samples were embedded in optimum-cutting-temperature compound (Tissue-Tek; Sakura Finetechnical, Tokyo, Japan) and sliced at 20  $\mu\text{m}$  thickness using a cryostat (CM1950; Leica Microsystems K. K., Tokyo, Japan). The tissue slices were fixed with acetone (FUJIFILM Wako Pure Chemical Corporation, Osaka, Japan) at  $-20\text{ }^{\circ}\text{C}$  for 10 min. The samples were subjected to a blocking procedure with Block Ace (UK-B80, SCETI K. K., Tokyo, Japan). Mouse monoclonal antibody for glial fibrillary acidic protein (GFAP) (1:200; Sigma-Aldrich, Missouri, USA) was applied to the samples as the primary antibody followed by Alexa Fluor 488 goat anti-mouse IgG (1:500, Thermo Fisher Scientific, MA, USA) as the secondary antibody, with Alexa Fluor 633 phalloidin (1:500, Thermo Fisher Scientific) and Hoechst 33342 (1:500, Dojindo Laboratories, Kumamoto, Japan) used for immunostaining. After immunostaining, the specimens were mounted and visualized using a confocal laser scanning microscope (LSM 900 with Airyscan 2; Zeiss, Oberkochen, Germany).
